# Supplementary material for: Identification of bovine CpG SNPs as potential targets for epigenetic regulation via DNA methylation
Source: PLOS journal article supplement (doi:10.1371/journal.pone.0222329), 2019-09-12
Supplement: S1 (10.1371/journal.pone.0222329.s001) [file journal.pone.0222329.s001]

**S1 Table. Classification of meSNPs from the sequence ontology (SO term) annotation provided by Ensembl**

| Categories                         | Variables that make up each category (SO term)                                                                                                                                                                                                                                                 |
|------------------------------------|------------------------------------------------------------------------------------------------------------------------------------------------------------------------------------------------------------------------------------------------------------------------------------------------|
| Proximal promoter                  | Upstream gene variant                                                                                                                                                                                                                                                                          |
| Intronic region                    | Splice acceptor variant<br>Splice donor variant<br>Intron variant                                                                                                                                                                                                                              |
| Coding region                      | Stop gained<br>Frameshift variant<br>Stop lost<br>Start lost<br>Inframe insertion<br>Inframe deletion<br>Missense variant<br>Protein altering variant<br>Incomplete terminal codon variant<br>Stop retained variant<br>Synonymous variant<br>Coding sequence variant<br>NMD transcript variant |
| Non-coding RNA region              | Mature miRNA variant<br>Non-coding transcript exon variant<br>Non coding transcript variant                                                                                                                                                                                                    |
| Intergenic region                  | Downstream gene variant<br>Intergenic variant                                                                                                                                                                                                                                                  |
| Regulatory region                  | TFBS ablation<br>TFBS amplification<br>TF binding site variant<br>Regulatory region ablation<br>Regulatory region amplification<br>Regulatory region variant                                                                                                                                   |
| 5'UTR                              | 5 prime UTR variant                                                                                                                                                                                                                                                                            |
| 3'UTR                              | 3 prime UTR variant                                                                                                                                                                                                                                                                            |
| Transcript deletion region         | Transcript ablation                                                                                                                                                                                                                                                                            |
| Transcription amplification region | Transcript amplification                                                                                                                                                                                                                                                                       |
| Splice region                      | Splice region variant                                                                                                                                                                                                                                                                          |
| Elongation region                  | Feature elongation                                                                                                                                                                                                                                                                             |
| Feature truncation                 | Feature truncation                                                                                                                                                                                                                                                                             |
